# Supplementary material
Source: PubMed Central journal article supplement (PMC3690882)
Supplement: 1307002110_pnas.201307002SI.pdf [file 1307002110_pnas.201307002SI.pdf]

# Supporting Information

Kampmann et al. 10.1073/pnas.1307002110

## Definition of Buffering and Synergistic Genetic Interactions

High-density genetic interaction (GI) maps not only reveal functional groups of genes based on the correlation of their GI patterns but also comprehensively quantify GIs, which can be interpreted directly to gain insight into the nature of the relationship between genes, and, ideally, to reconstruct entire pathways (1, 2). One classical example of an interpretable GI is the case of two genes that act in parallel pathways and partially compensate for each other's loss. Depletion of either gene product will have a moderate effect; depletion of both will have a much stronger effect, which typically is referred to as "synergistic" or "synthetic sick/synthetic lethal" GI. The opposite type of GI is characteristic of genes acting in a linear pathway: Depletion of either gene product interferes with the pathway and causes a given phenotype. In combination, depletion of both gene products together has no additive effect on the phenotype; such an interaction is referred to as a "buffering" GI. Genes encoding subunits of a physical complex often are connected by one type of GI, either buffering or synergistic, a phenomenon referred to as "monochromaticity" (3).

In the case of GIs between genes whose knockdowns have deleterious effects ("negative" phenotypes), positive GIs are buffering and negative GIs are synergistic. Conversely, in the case of GIs between genes whose knockdowns have beneficial effects ("positive" phenotypes), negative GIs are buffering and positive GIs are synergistic (4). GIs between genes of mixed phenotypes or with paradoxical double-mutant phenotypes [sometimes referred to as "sign epistasis" (5)] are more difficult to interpret. A qualitative classification of different cases of GIs has been proposed (6), but to our knowledge, a method for mapping quantitative GIs between mixed-phenotype genes onto a continuum of synergistic to buffering GIs has not previously been developed.

"Raw" GIs generally are defined as follows:

$$\text{GI} = \text{Observed double-shRNA phenotype} \\ - \text{Expected double-shRNA phenotype.}$$

We explored two possible definitions for synergistic and buffering GIs that differ in their interpretation of sign epistasis (Fig. S4):

Buffering/synergistic GI definition 1:

$$\text{Buffering GI} = \text{sign}(\text{Expected double-shRNA phenotype}) \\ \times (\text{Expected double-shRNA phenotype} \\ - \text{Observed double-shRNA phenotype}).$$

Buffering/synergistic GI definition 2:

$$\text{Buffering GI} = |\text{Expected double-shRNA phenotype}| \\ - |\text{Observed double-shRNA phenotype}|.$$

To evaluate whether these definitions are biologically meaningful, we determined the distribution of buffering and synergistic GIs between shRNAs targeting the same gene, genes encoding subunits of the same complex, and other shRNAs (Fig. S4). For both definitions, shRNAs targeting the same gene or subunits of complexes generally were connected by buffering GIs, whereas the distribution of GIs for other shRNAs was centered around 0 (Fig. S4). We investigated whether clustering genes according to the correlation of buffering/synergistic GIs, as opposed to raw GIs, would improve the clustering of biologically meaningful groups of genes, but this was not the case for our dataset. Therefore, we created GI maps by clustering genes based on raw GIs but colored them using a heatmap based on buffering/synergistic GIs (according to definition 2) to make individual GIs interpretable.

1. Phillips PC (2008) Epistasis—the essential role of gene interactions in the structure and evolution of genetic systems. *Nat Rev Genet* 9(11):855–867.
2. Battle A, Jonikas MC, Walter P, Weissman JS, Koller D (2010) Automated identification of pathways from quantitative genetic interaction data. *Mol Syst Biol* 6:379.
3. Segrè D, Deluna A, Church GM, Kishony R (2005) Modular epistasis in yeast metabolism. *Nat Genet* 37(1):77–83.
4. Phillips PC, Otto SP, Whitlock MC (2000) Beyond the average - the evolutionary importance of gene interactions and variability of epistatic effects. Epistasis and

the Evolutionary Process, eds Wolf JB, Brodie ED, Wade MJ (Oxford Univ Press, Oxford, UK).

5. Weinreich DM, Watson RA, Chao L (2005) Perspective: Sign epistasis and genetic constraint on evolutionary trajectories. *Evolution* 59(6):1165–1174.
6. Drees BL, et al. (2005) Derivation of genetic interaction networks from quantitative phenotype data. *Genome Biol* 6(4):R38.



were ranked using our approach (the MW test and negative controls) or different versions of the RIGER algorithm ([www.broadinstitute.org/cancer/software/GENE-E](http://www.broadinstitute.org/cancer/software/GENE-E)). The number of overlapping hit genes from two half-libraries is shown for hit gene sets of different sizes.

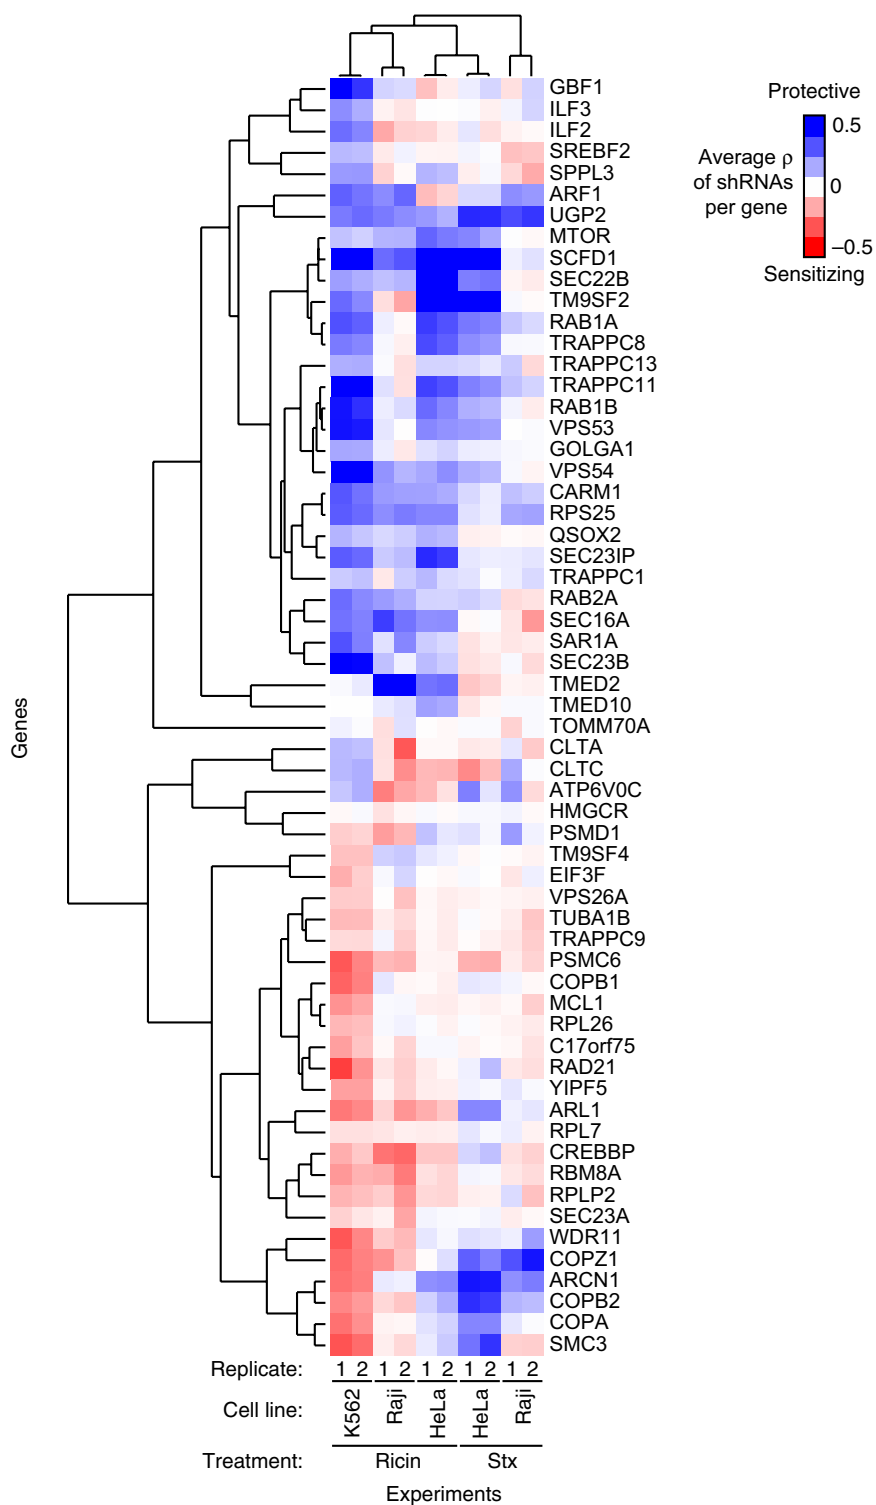

Fig. S2. Alternative presentation of the data from Fig. 4B. Averaged ricin resistance phenotypes ( $\rho$ ) per gene and experimental replicates are displayed separately.

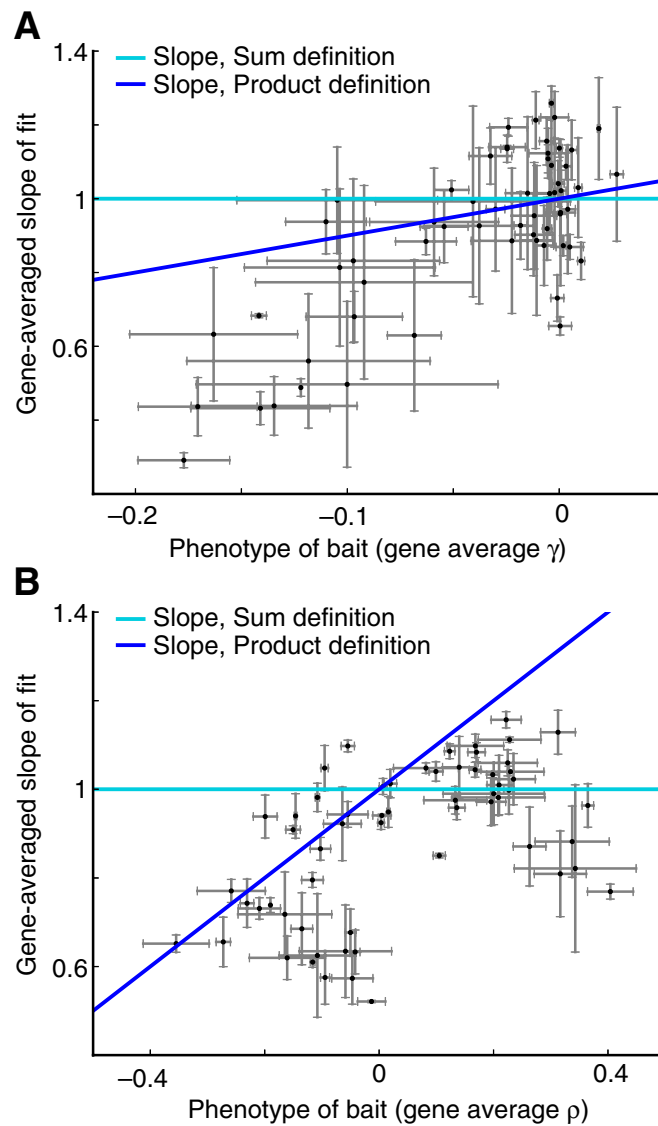

**Fig. S3.** Definitions of the expected double-shRNA phenotypes. The relationship between single-shRNA phenotypes and double-shRNA phenotypes for growth and ricin resistance in K562 cells was fitted linearly as in Fig. 5A for all shRNAs (“baits”) in the double-shRNA library. Slopes of these linear fits are plotted as a function of the single-shRNA phenotype of the bait; dots and error bars denote averages and SD, respectively, of shRNAs targeting the same gene. The slopes obtained by the sum of product definitions for expected double-shRNA phenotypes are shown as light and dark blue lines, respectively. (A) Double-shRNA phenotypes for growth-based screen. (B) Double-shRNA phenotypes for ricin resistance-based screen.



GI based on growth  
 Synergistic -0.05  0.05 Buffering

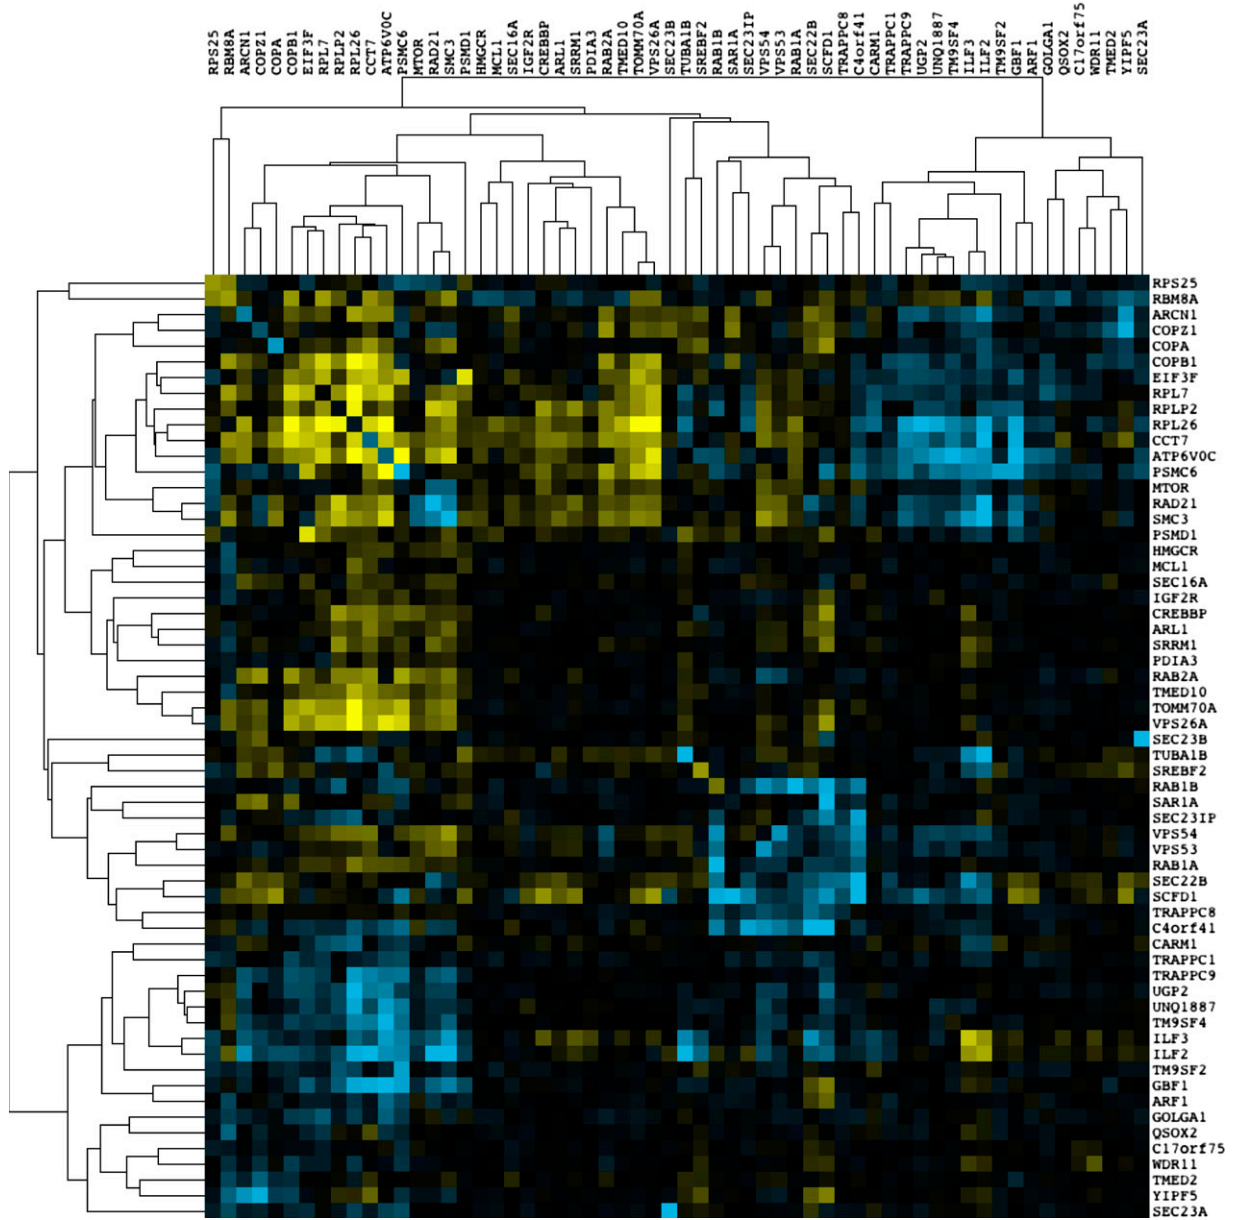

Fig. S5. GI map based on growth phenotypes. This figure is a version of Fig. 6A labeled with gene names.

GI based on ricin resistance  
 Synergistic -0.2  0.2 Buffering

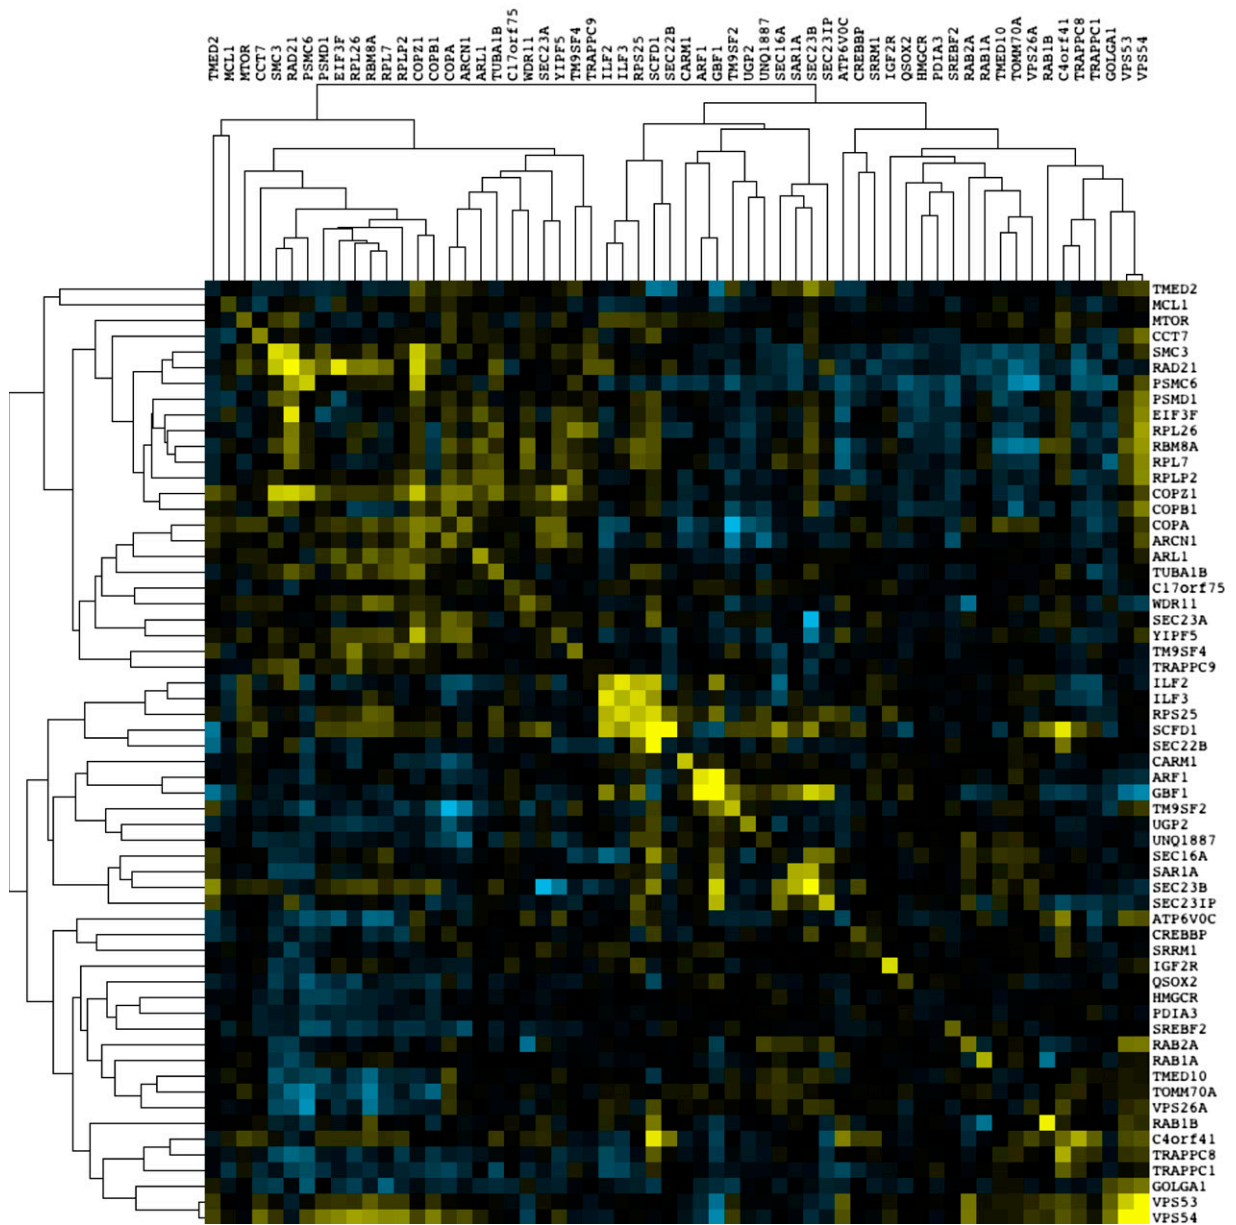

Fig. S6. Genetic interaction map based on ricin resistance phenotypes. This figure is a version of Fig. 6B labeled with gene names.
